# Supplementary material
Source: PubMed Central journal article supplement (PMC3496248)

# Supplemental info.

Figure 1. Lymphocyte populations in the spleen of the various MRL/lpr mice used in the study. A. mlg transgene rescued B cells in JHT mice. The results were from representative JHT.MRL/lpr, JHT.mlg.MRL/lpr, and JHT.mlg.AID<sup>-/-</sup>MRL/lpr mice. B. no significant difference in the total number of CD4<sup>+</sup> and CD8<sup>+</sup> populations between JHT.mlg.MRL/lpr strain and its AID-deficient counterpart.

Figure 2. AID deficiency impacted the B cell population fractions but showed no significant impact on overall T cell numbers in JHT.mlg.MRL/lpr mice. A. AID deficiency reduced newly formed B cells but increased mature follicular B cells. Eleven JHT.mlg.MRL/lpr mice and 12 JHT.mlg.AID<sup>-/-</sup>MRL/lpr mice at 5-6 months of age were used. B. No significant difference of CD4<sup>+</sup> and CD8<sup>+</sup> T cells among different strains. Sample sizes for MRL/lpr, JHT.MRL/lpr, JHT.mlg.MRL/lpr, and JHT.mlg.AID<sup>-/-</sup>MRL/lpr were 6, 5, 20, 22 mice respectively. About 7 months old mice were used.

A.

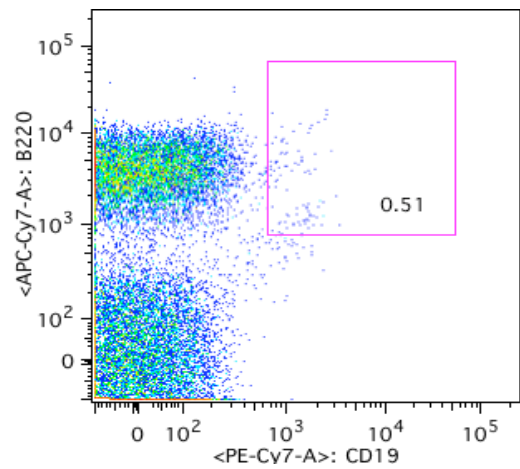

JHT

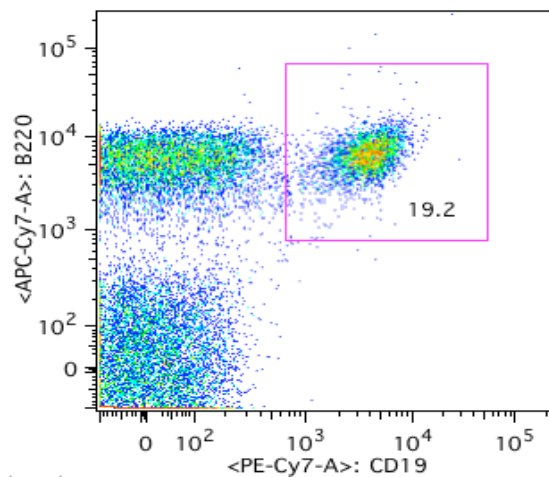

JHT.mIlg

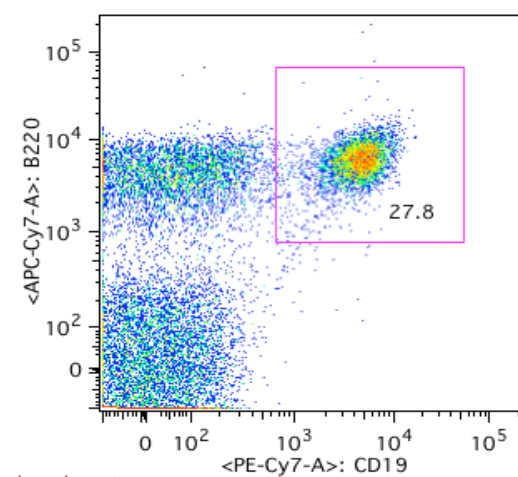JHT.mIlg.AID<sup>-/-</sup>

B.

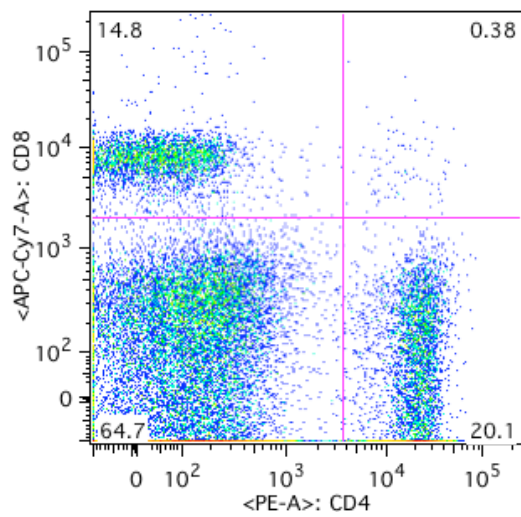

JHT.mIlg

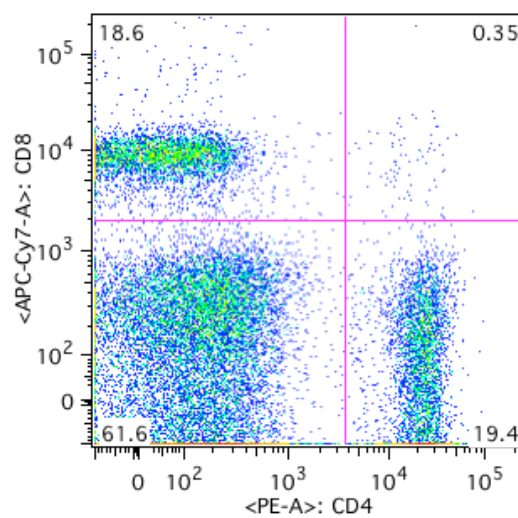JHT.mIlg.AID<sup>-/-</sup>

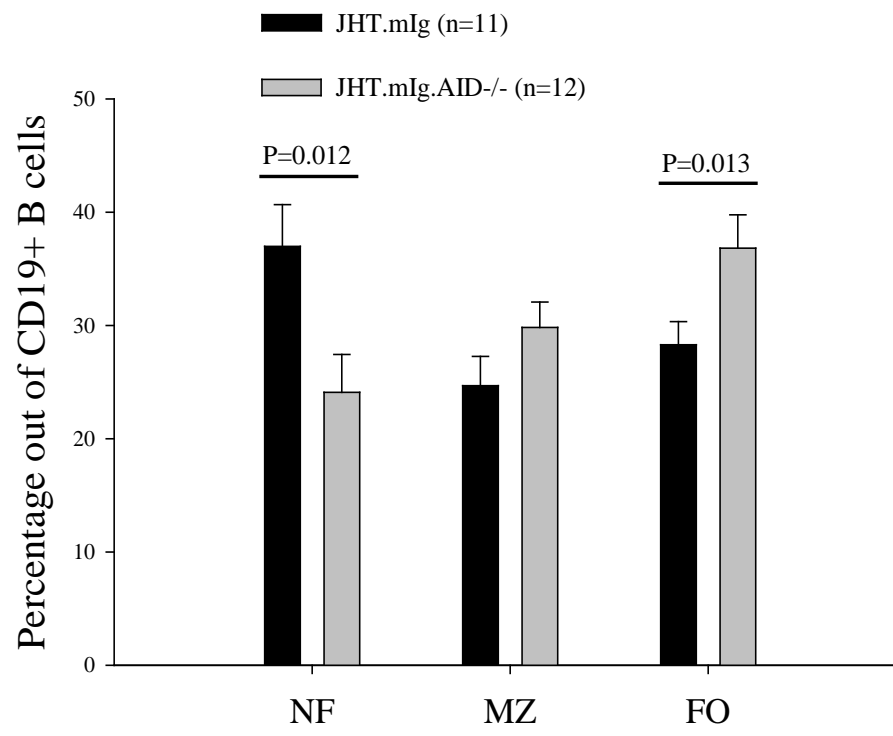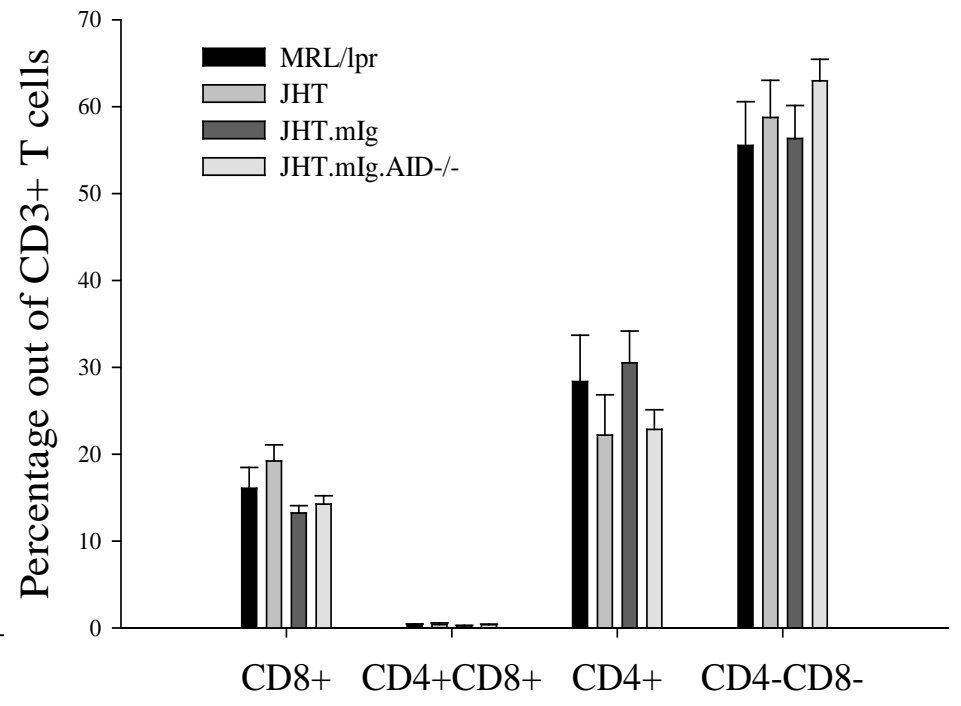

Supplement: NIHMS403614-supplement-E7898B063BD6D43B1F8C6D634AC769D9.pdf [file NIHMS403614-supplement-E7898B063BD6D43B1F8C6D634AC769D9.pdf]
